# Supplementary material
Source: Springer Nature journal article supplement (https://www.springermedizin.de/resource/supplementary/12891_2008_526_MOESM3_ESM.pdf/9511242)

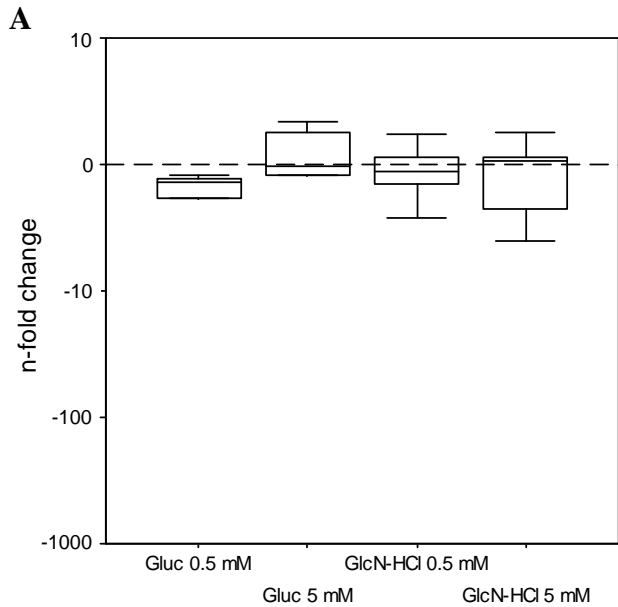

HAS 1

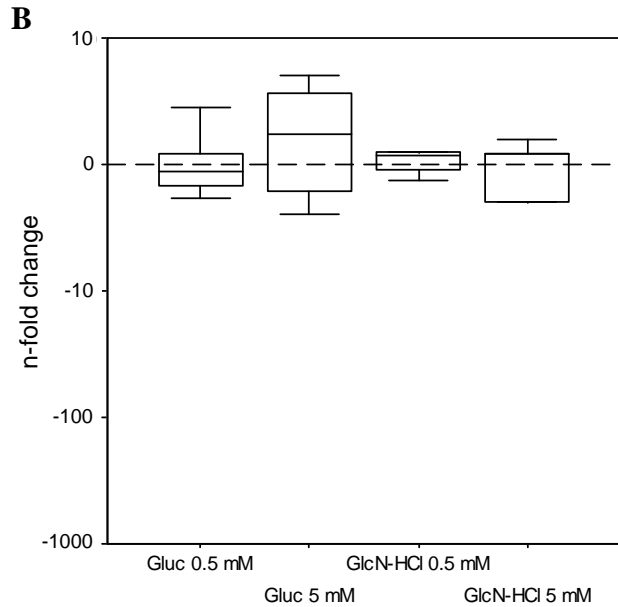

HAS 2

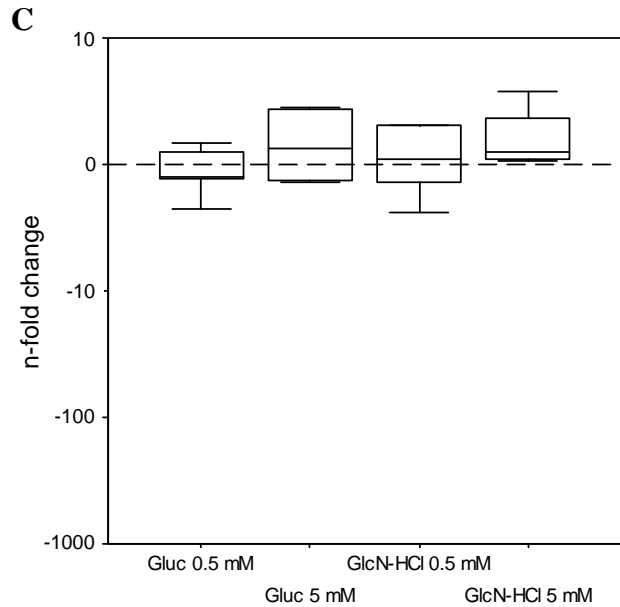

HAS 3

Supplement: MOESM3 [file 9511242]
